# Supplementary material
Source: Copernicus journal article supplement (doi:10.5194/egusphere-2026-1582)
Supplement: Supplementary file [file egusphere-2026-1582-RC1-supplement.pdf]

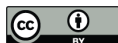

## Methane dynamics along the salinity gradient of the Scheldt estuary

Annalisa Delre<sup>1</sup>, Thomas Röckmann<sup>2</sup>, David J. Bonell Fontas<sup>2</sup>, Julia C. Engelmann<sup>1</sup>, Helge Niemann<sup>1,3</sup>

5 <sup>1</sup>Department of Marine Microbiology & Biogeochemistry, Royal Netherlands Institute for Sea Research (NIOZ), Texel, the Netherlands

<sup>2</sup>Institute for Marine and Atmospheric Research Utrecht (IMAU), Utrecht University, Utrecht, the Netherlands

<sup>3</sup>Department of Earth Sciences, Utrecht University, Utrecht, the Netherlands

Correspondence to: Annalisa Delre (annalisa.delre@nioz.nl)

10 **Abstract.** Estuaries are important natural sources of methane (CH<sub>4</sub>) to the atmosphere. These transitional aquatic systems connect freshwater, brackish and fully marine environments. The pronounced salinity gradient, characteristic of estuaries, impose particular challenges to microbes and influence the biogeochemical processes they mediate. Salinity changes can inhibit methanotrophic activity. Here we analysed methane dynamics and microbial communities in the estuary of the Scheldt River, which flows through northern France, western Belgium, and the southwestern  
15 Netherlands, and finally discharges into the North Sea. During a research cruise conducted in June 2022 from the river mouth to Antwerp, water samples were collected at ten stations along the estuarine salinity gradient. We investigated water column CH<sub>4</sub> inventory and stable carbon isotope dynamics, together with methane oxidation rates. Elevated CH<sub>4</sub> concentrations of up to 110 nM with associated δ<sup>13</sup>C -values of about -46‰ were found in the freshwater zone of the upper estuary (in the area of the city of Antwerp). Rather than a gradual decrease in CH<sub>4</sub> towards the North Sea, we  
20 observed a second maximum of 180 nM in the marine zone, with a contrasting isotopic composition of -66‰ indicating distinct methanogenic pathways and/or substrates in the estuary. Methane oxidation rates showed no clear relationship with the salinity gradient. In contrast, the composition of the methanotrophic community shifted markedly along the estuary and the salinity gradient, with *Methyloparacoccus* and *Crenothrix* prevailing in the freshwater zone *Methyloceanibacter* and *PLTB-vmat-59* dominating in the mixing and marine zones. Our results thus demonstrate that  
25 the salinity gradient is not the primary control on estuarine methane oxidation capacity but the community composition of the methane oxidizing bacteria (MOB). In sediments, the MOB community composition mirrored the patterns observed in the overlying water column, indicating that estuarine sediments represent both a key habitat and an important recruitment source sustaining methanotrophic communities in the water column. Despite an active microbial filter, methane oxidation accounted for only a minor fraction of the estuaries' CH<sub>4</sub> budget. Most methane (about 98%)  
30 was lost through advection and diffusive fluxes to the atmosphere, while a smaller fraction was exported to the North Sea, contributing to sustained methane supersaturation in coastal waters.

**Keywords** Salinity gradient · Methane budget · Stable isotopes · Methane oxidation · MOB community



## 1 Introduction

Methane (CH<sub>4</sub>) is the second most important anthropogenic greenhouse gas after carbon dioxide (CO<sub>2</sub>, IPCC, 2021). On a molecular basis, atmospheric CH<sub>4</sub> has a stronger impact on climate than CO<sub>2</sub>, which is reflected by its 32-fold higher global warming potential (GWP) relative to CO<sub>2</sub> on a 100 year time horizon (Etminan et al., 2016). Moreover, CH<sub>4</sub> has a relatively short atmospheric lifetime of ~10 years (Canadell et al., 2021). Atmospheric CH<sub>4</sub> concentrations have been rising since industrialisation, reaching 1930 ppb in 2025 (Lan et al., 2025). This increase is largely driven by human activity, especially agriculture, fossil fuel extraction and use, waste disposal and land use change (Woodward et al., 2010, Ciaia et al., 2013; Canadell et al., 2021, Fluet-Chouinard et al., 2023). However, global change-related warming and eutrophication were discussed to potentially cause elevated CH<sub>4</sub> fluxes from inland waters and the coastal ocean in the future. Coastal environments are extremely diverse encompassing shallow shelf seas as well as vegetated areas such as mangroves, salt marshes, and seagrass meadows, but also tidal flats and estuaries (Rosentreter et al., 2023).

A recent data-driven synthesis estimated that global estuaries - including tidal systems, deltas, lagoons, and fjords - emit ~0.25 (0.07–0.46) Tg CH<sub>4</sub> yr<sup>-1</sup> (Rosentreter et al., 2023). As for most natural sources of atmospheric CH<sub>4</sub>, estimates of CH<sub>4</sub> emissions from estuaries also remains highly uncertain due to pronounced spatial and temporal variability and limited observational coverage. The distribution of CH<sub>4</sub> input to estuaries is shaped by interacting processes, including upriver inputs, microbial production in the estuarine riverbed and inputs from industries (Scranton & McShane, 1991; Middelburg et al., 2002; Abril & Borges, 2004; Brown & Bass., 2022). Major removal pathways for dissolved CH<sub>4</sub> include river water release to the open sea, emissions to the atmosphere and microbial oxidation within the water column. The latter is moderated by aerobic methane oxidizing bacteria (MOB; Knief, 2015), which convert CH<sub>4</sub> to CO<sub>2</sub> thereby retaining a potentially important fraction of CH<sub>4</sub> in the estuarine water column (Abril & Iversen, 2002; Jacques et al., 2021; Mao et al., 2022).

The known MOB comprise Gammaproteobacteria (type I and type X), Alphaproteobacteria (type II), Verrucomicrobia, and members of candidate division NC10 (Knief, 2015). Molecular identification commonly relies on the 16S rDNA and the *pmoA* genes (Tavormina et al., 2008), although these markers primarily target currently known methanotrophs and may overlook novel or phylogenetically divergent lineages (Knief, 2015).

Microbial methane oxidation rates are strongly influenced by environmental conditions, including CH<sub>4</sub> concentration (Jakobs et al., 2013; Mau et al., 2013; Gentz et al., 2014), temperature (Lofton et al., 2014), oxygen availability (Guérin & Abril, 2007), suspended particulate matter (Middelburg et al., 2002; Abril et al., 2007), light (Dumestre et al., 1999; Murase & Sugimoto, 2005), translocation of methanotrophs with currents and rising bubbles (Schmale et al., 2015; Steinle et al., 2015) and notably salinity (de Angelis & Scranton, 1993; de Groot et al., 2025). Salinity is particularly relevant in estuarine transition zones, where freshwater and marine water mix. Several studies have shown that increasing salinity in estuaries is associated with reduced methane oxidation rates (de Angelis & Scranton, 1993; Osudar et al., 2015; Sherry et al., 2016). Other studies showed that salinity changes seemed to have rather small effects on the activity of methanotrophs and it has been suggested that methanotrophic communities may have adapted to such variability (de Groot et al., 2023, 2025; Zhang et al., 2023).



Finally, aerobic oxidation preferentially removes isotopically light CH<sub>4</sub>, causing progressive <sup>13</sup>C-enrichment of the residual CH<sub>4</sub> pool (Whiticar, 1999). Analyses of CH<sub>4</sub> stable isotope signatures (δ<sup>13</sup>C-CH<sub>4</sub> and δD-CH<sub>4</sub>) have proven highly effective in identifying CH<sub>4</sub> sources and sinks across diverse environments (Jacques et al., 2021). For example, Sasakawa et al., (2008) demonstrated that sinking particles are the primary source of subsurface CH<sub>4</sub> supersaturation in the oxygenated open ocean, where extensive microbial oxidation within particle microenvironments strongly modifies the isotopic signature of the produced CH<sub>4</sub>.

The aim of this study is to quantify the distribution, transformation, and fate of dissolved CH<sub>4</sub> in the Scheldt estuary by integrating CH<sub>4</sub> concentrations, flux measurements, stable isotope signatures, and microbial oxidation rates. Specifically, we seek to (i) assess the relative contributions of riverine input, sedimentary methanogenesis, atmospheric efflux, and export to the coastal ocean; to (ii) quantify the activity, abundance, and community composition of methane-oxidizing bacteria and to (iii) evaluate environmental controls on MOB community dynamics and activity.

## 2 Materials and methods

### 2.1 Study area

The Scheld estuary borders Northwest Belgium (Flanders) and the southwestern part of the Netherlands. It is highly eutrophic due to large inputs of nutrients (Struyf et al., 2004), contains elevated levels of heavy metals (Perrot et al., 20023) as well as organic pollutants (Van der Ael et al., 2012, Groffen et al., 2025). The estuary extends from the North Sea at Vlissingen (km 0) to Ghent (km 160). Upriver, sluices limit the tidal wave in the Upper Scheldt. The longitudinal salinity profile of the Scheldt estuary is primarily controlled by river discharge, with the transition between fresh and salt water being particularly variable (Van Damme et al., 2005; Soetaert et al., 2006). The estuary's water column is vertically well mixed (except during peak discharges). The horizontal salinity gradient is highly sensitive to seasonal changes in river discharge and to tidal oscillation (Meire et al., 2005). Previous studies indicated that dissolved CH<sub>4</sub> in the estuary is very high and variable at various spatial and temporal scales (Middelburg et al., 2002; Jaques et al., 2021), CH<sub>4</sub> was typically elevated at upriver locations.

### 2.2 Sampling scheme

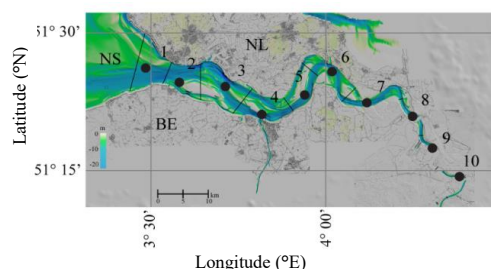

**Figure 1.** Study area with the locations of sampling stations (black dots) and station sections.

Water column and atmospheric sampling was conducted during a cruise with R/V *Navicula* in June 2022 along a gradient from almost fully marine (SW off Vlissingen, see Fig 1) to fully lacustrine conditions (Antwerp). We selected 10 stations that were approximately equidistant from each other. Water samples were taken with Niskin bottles from two different depths (de Groot et al., 2023): about 1 m above the estuaries' bed (“bottom”) and 1 m below the water surface (“surface”).



Samples were taken to analyze dissolved CH<sub>4</sub> and associated δ<sup>13</sup>C-values as well as MOx and associated MOB community structure. At four stations, we also collected sediments using a box corer (de Groot et al., 2023). Immediately upon recovery, the box corer was subsampled in triplicate with small pushcores (~18 cm sediment recovery). Surface sediments (0-5 cm) were collected in geobags (LDPE bags) and kept cold (4 °C) for incubation experiments. Finally, surface sediments were also sampled into 2 ml cryovials and kept at -80 °C for further molecular analysis.

### 2.3 Atmosphere measurements of CH<sub>4</sub> and water column atmosphere measurements

*p*CH<sub>4a</sub> was measured with a Picarro G2301 gas concentration analyser on board. The instrument was directly connected to a floating chamber (0.08 m<sup>3</sup>) and atmospheric values were recorded when the chamber was uplifted. We additionally collected gas samples in Tedlar Bags to analyze *p*CH<sub>4</sub> and associated δ<sup>13</sup>C-values as described previously (Jacques et al., 2021). The floating chambers were also used to measure the efflux of CH<sub>4</sub> from the sea surface/river surface. For this, the chamber was placed on the water surface with the rim of the chamber being kept submerged with attached weights. In this way, liberated CH<sub>4</sub> accumulates in the chamber. Accumulation was recorded online with the Picarro system and the efflux was calculated from the increase in CH<sub>4</sub> mixing ratio over time.

### 2.4 Dissolved methane concentrations and stable isotope ratios

Dissolved CH<sub>4</sub> concentrations were determined using a headspace (HS) technique (Green, 2005). In brief, 260 ml glass serum bottles were filled in triplicates from the Niskin bottle, closed with black-butyl rubber stoppers (Rubber B.V., the Netherlands) and crimped top-sealed. We then added 10 ml of N<sub>2</sub> (in exchange with sample water) to create a headspace and fixed the sample with 5 ml NaOH solution (25% w/v). CH<sub>4</sub> concentrations in the headspace were measured by gas chromatography with flame ionization detection (Thermo Scientific FOCUS GC) equipped with a Restek stainless steel column (HS-Q 80/100 SS GEN config, length 2 m, 2 mm ID, 1/8 OD) and using N<sub>2</sub> as a carrier gas (de Groot et al., 2023). From the same samples/bottles, the stable carbon isotope compositions was measured with a gas chromatography isotope ratio mass spectrometry system (GC-IRMS, Thermo Delta V, Thermo Fisher Scientific Inc., Germany) (Brass and Röckmann, 2010; Röckmann et al., 2016). All Isotopic values are represented in the delta notation (δ<sup>13</sup>C) against the Vienna Peedee belemnite (VPDB) standard. The GC and GC-IRMS systems were also used to measure CH<sub>4</sub> concentrations and stable carbon isotope composition during the incubation experiments (see below).

### 2.5 Methane oxidation rates (MOx)

MOx was determined through ex situ incubations with trace amounts of <sup>3</sup>H-labelled CH<sub>4</sub> as describe previously (Niemann et al., 2015). Aliquots from the Niskin bottle were filled in 20 ml glass vials in quadruplicates, sealed headspace free with grey-bromobutyl stoppers that are known to not hamper methanotrophic activity, and amended with 10 μl N<sub>2</sub>/<sup>3</sup>H-CH<sub>4</sub> (4.5 kBq; American Rabiolabeled Chemicals, USA). Samples were incubated for 72 h at situ temperature in the dark. Activity of residual C<sup>3</sup>H<sub>4</sub> and the product of methane oxidation (<sup>3</sup>H<sub>2</sub>O) were measured by liquid scintillation counting. First-order constant (*k*) was determined from the fractional turnover of the added tracer (Reeburgh, 2007):



$$k = \frac{{}^3\text{H}_2\text{O}}{{}^3\text{H}_2\text{O} + \text{C}^3\text{H}_4} \times \frac{1}{t} \quad \text{eq 1.1}$$

Where  $t$  is incubation time in days.  $k$  was corrected for tracer turnover in killed controls ( $k_{\text{KC}}$ , fixed with 10ul  $\text{HgCl}_2$  directly after sampling) and multiplied with methane concentrations  $[\text{CH}_4]$ , to determine MOx:

$$\text{MOx} = (k - k_{\text{KC}}) \times [\text{CH}_4] \quad \text{eq 1.2}$$

## 2.6 Stable isotope systematics of methanotrophy and methanogenesis

Apparent isotopic fractionation ( $\epsilon$ ) of the water column MOB community was determined from incubation experiments with water collected at 6 stations along the estuary. For this, surface water was collected in 2 l bottles from each station and triplicates of 99.5 ml estuarine water were filled into 260 ml crimp top vials in our home laboratories. After sealing the vials with red butyl rubber stoppers (Rubber B.V., the Netherlands), the remaining  $\text{CH}_4$  from the estuary water was stripped out by percolating it with compressed air. We then established homogenous  $\text{CH}_4$  concentrations in serum vials in the following way: we firstly created  $\text{CH}_4$  saturated water by overlying 100 ml MilliQ with 100%  $\text{CH}_4$  gas ( $\delta^{13}\text{C} = -40\text{‰}$ ) in a 260 ml crimp top vial which was left to equilibrate for 24h in a fridge. Then, 0.5 ml of  $\text{CH}_4$  saturated water was injected into the incubation vials yielding a  $\text{CH}_4$  concentration of 2.25 mM at the beginning of the incubation. Four additional bottles were prepared similarly, but 40  $\mu\text{l}$  of  $\text{HgCl}_2$  was added to stop biological activity (kill controls). The bottles were then incubated at 25°C in the dark and headspace measurements of  $\text{CH}_4$  concentrations and stable carbon isotope composition were conducted every day for 3 days.

$\epsilon$ -values associated with methane oxidation were determined from the fraction of the residual  $\text{CH}_4$  and associated  $\delta^{13}\text{C}$ -values considering Rayleigh distillation processes for a closed system:

$$\delta = \delta_0 + \epsilon \ln f \quad \text{eq 1.3}$$

where  $\delta$  is the  $\delta^{13}\text{C}$  value of the residual  $\text{CH}_4$ ,  $\delta_0$  is the initial isotopic composition, and  $f$  is the fraction of  $\text{CH}_4$  remaining-

Because the incubations were closed and no external  $\text{CH}_4$  input occurred, the Rayleigh model appropriately describes the progressive  $^{13}\text{C}$  enrichment of the remaining  $\text{CH}_4$ .

To determine the sedimentary source  $\delta^{13}\text{C}$ - $\text{CH}_4$  signature, 20ml sediment collected from box coring (see section 3.3) were mixed with 80 ml of local,  $\text{CH}_4$ -free estuary water. The bottles were then crimp top sealed with red butyl rubber stoppers and incubated at 25°C in the dark for 10 days.  $\text{CH}_4$  concentrations and associated stable carbon isotope composition was measured every 2 days (see above).

## 2.7 Molecular identification of methanotrophic communities

DNA was extracted from particulate organic matter collected on filters (GF/F 47 mm, 0.3  $\mu\text{m}$  nominal mesh size, Advantec MFS; pre-combusted at 450 °C for 4h) and sediment core tops using the DNeasy PowerSoil Pro Kit from Qiagen.

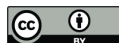

16S rRNA gene amplification was performed from biological triplicate with the **universal SSU primer pair** 515F-Y/806-R (515F: GTGYCAGCMGCCGCGGTAA, 806R: GGACTACNVGGGTWTCTAAT) targeting the V4 hypervariable regions. The forward and reverse primers were both barcoded with a unique 12 nucleotide Golay code. The PCR reaction mix contained 11.75 µl PCR grade water, 5 µl 5× Phusion HF buffer, 2 µl dNTPs (2.5 mM), 1 µl BSA (920 mg/ml), 0.25 µl (2 U/µl) Phusion polymerase, and 1.5 µl of each forward and reverse primer (10 µM) and 2 µl of DNA. PCR was performed in a thermocycler with the following program: 98°C for 30 s followed by 45 cycles of 98°C for 10 s 50°C for 20 s, 72°C for 30 s, with a final elongation of 72°C for 7 min; thereafter, samples were kept at 4°C.

PCR product concentrations were measured on a 4200 TapeStation - D1000 (Agilent, United States). Afterwards, they were pooled in equimolar amount and subjected to PCR purification using the QIAquick PCR purification kit (QIAGEN, United States) according to the manufacturer's instructions, followed by 1% gel electrophoresis. The band was visualized on a UV illuminator, excised from the gel and purified using the QIAquick gel extraction kit. Amplicon sequencing was carried out on an Illumina NextSeq 2000 sequencing platform (generating paired-end reads of length 2 × 300 nt) at USEQ (Utrecht University, the Netherlands).

The raw data were processed using the NIOZ in-house amplicon sequence analysis pipeline "Cascabel" (Abdala Asbun et al., 2020), according to the following specifications: Prior to AVS identification, reads were truncated to 270 bp and 200 bp for forward and reverse reads, respectively. AVS designation was done using DADA2 v.1.19.1. Chimeric sequences were identified based on consensus across samples and subsequently removed from the dataset. Similarly, singletons with an abundance lower than 2, were excluded from further analyses. Taxonomy was assigned using DADA2's native implementation of the naïve Bayesian classifier method RDP by using the Silva v138.1 release (Quast et al., 2013) as reference database.

#### 2.4 Abundance of methanotrophic bacteria assessed by quantitative PCR (qPCR)

For qPCR-based quantification of 16S rRNA gene copy numbers, the **universal SSU primer** pair 515F-Y/806R was used. The qPCR reaction mix contained 11.13 µl PCR grade water, 5 µl 5× Phusion HF buffer, 2 µl dNTPs (2.5 mM), 1 µl BSA (920 mg/ml), 0.625 µl EvaGreen 20× qPCR dye, 0.25 µl (2 U/µl) Phusion polymerase, and 1.5 µl of each forward and reverse primer (10 µM) and 2 µl of DNA template. A Bio-rad CFX Opus Real-Time PCR System was used to run the qPCRs. The cycling conditions for the qPCR reactions consisted of an initial 98°C for 30 s followed by 45 cycles of 98°C for 10 s 50°C for 20 s, 72°C for 30 s, with a final elongation of 72°C for 7 min; thereafter, samples were kept at 4°C.

#### 2.5 Analysis of nutrients and dissolved carbon

*Nutrients* ( $\text{PO}_4^{3-}$ ,  $\text{NH}_4^+$ ,  $\text{NO}_3^-$ ,  $\text{NO}_2^-$ ) were analysed on a TRAACS Gas Segmented Continuous Flow Analyser (manufactured by Bran+Lubbe, now SEAL Analytical). All measurements were calibrated with standards diluted in low nutrient seawater (LNSW) in the salinity range of the samples (~35‰ to ensure that analysis remained within the same ionic strength; Murphy and Riley, 1962; Helder and de Vries, 1979; Grasshoff et al, 1983). *Dissolved Inorganic Carbon (DIC)* and *Dissolved Organic Carbon (DOC)* were analyzed as described in Delre et al. (2023). Briefly, for

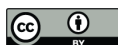

DOC analyses, 30 ml was filtered using GF/F inline filters (nominal mesh size = 0.7  $\mu\text{m}$ ; pre-combusted at 450  $^{\circ}\text{C}$  for 4 h) mounted in steel cartridges, and the effluent was collected in pre-combusted glass vials (EPA), acidified with concentrated HCl to pH <2 and stored at 4  $^{\circ}\text{C}$  until analysis. DOC was measured with a Shimadzu TOC-V VCSH with ASI-V auto sampler after removal of inorganic carbon by vigorous sparging with oxygen. The water was then injected

5 onto a combustion column packed with platinum-coated alumina beads at 720  $^{\circ}\text{C}$ . Non-purgeable organic carbon were combusted and converted to  $\text{CO}_2$ , which was then detected by a nondispersive infrared detector. For dissolved phase analysis, 5 ml of sample was taken immediately from the Niskin bottle for DIC analysis. This was also filtered over GF/F inline filters, and the effluent was collected headspace free in glass vials and analysed according to a method described previously (Stoll et al., 2001).

10

15

20

25

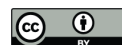

### 3 Results

#### 3.1 Physicochemical parameters: water column and atmosphere

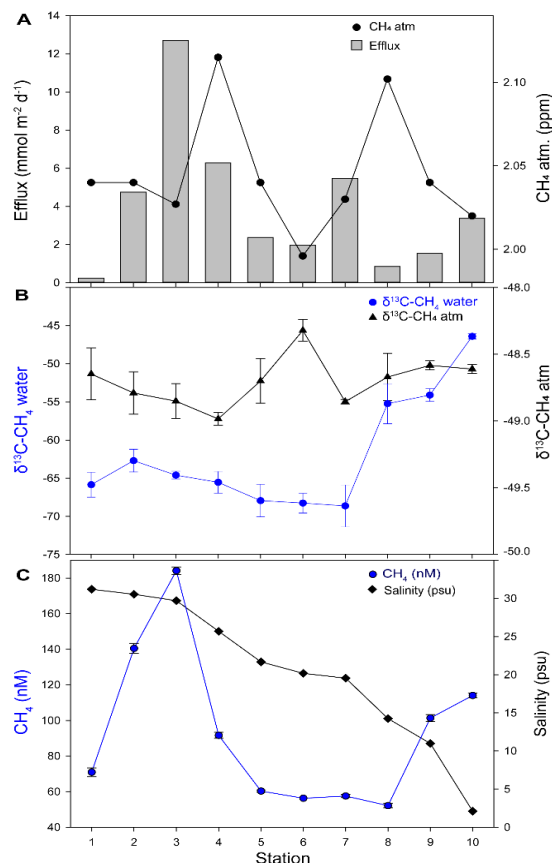

**Figure 2** CH<sub>4</sub> dynamics in the Scheldt estuary. **A** Efflux of CH<sub>4</sub> from water surface to atmosphere and methane concentrations in the atmosphere. **B** δ<sup>13</sup>C-CH<sub>4</sub> (‰ vs VPDB) of CH<sub>4</sub> dissolved and in atmosphere **C** Water column methane concentrations and salinity.

*Salinity & Temperature* - Following a concave down distribution pattern, salinity decreased from 33psu at station 1 in the North Sea to brackish/freshwater values of 2 psu at station 10 in the city of Antwerp (Fig 2 C). Three groups of water samples were defined: freshwater zone (salinity: 2 psu; station 10), mixing/brackish zone (salinity: 11-20.2 psu; stations 6-9) and seawater zone (salinity: 21.7-31.2 psu; stations 1-5). Water column temperatures showed an increasing trend from the North Sea (17.9°C) to Antwerp (20.5°C; Fig A1 appendix A).

*Methane* - Water column CH<sub>4</sub> concentrations (Fig 2 C) were generally >50 nM and thus supersaturated with respect to the atmospheric equilibrium (see below). We detected two CH<sub>4</sub> maxima, one at stations 3 (180 nM) and a second at station 10 (110 nM), while CH<sub>4</sub> concentrations were more constant in the mixing zone between stations 5-8 (50-60 nM). In general, there were no notable differences in CH<sub>4</sub> concentrations in surface and bottom waters. Given the minimal differences between the two layers, only surface water concentrations are presented here. Stable carbon isotope ratios of dissolved CH<sub>4</sub> were generally low with values of -62‰ to -70‰ from station 1 – 7 but increased sharply to -46‰ at station 10.

Atmospheric CH<sub>4</sub> mixing ratios (Fig 2 A) showed small variations around 2 ppm with two peaks at station 4 and

8 (respectively 2.12 and 2.1 ppm). The associated δ<sup>13</sup>C-CH<sub>4</sub> values (Fig 2 B) were generally around -48.8 and showed some smaller fluctuation, with the heaviest value at station 6 (-48.4‰). Atmospheric mixing ratios, surface water temperature and salinity levels translate to methane saturation levels of 2.9 nM at station 10 and 2.6 nM at station 1 (Wiesenburg & Guinasso, 1979). The entire estuary (CH<sub>4</sub> levels >50 nM at all sampling stations) was thus CH<sub>4</sub> supersaturated with respect to the atmospheric equilibrium and hence a source of CH<sub>4</sub> to the atmosphere. Also our floating chamber measurements revealed efflux of CH<sub>4</sub> from the river surface; this was highest at station 3, exceeding 12 mmol m<sup>-2</sup> d<sup>-1</sup>. Station 1 showed lowest CH<sub>4</sub> efflux with 0.2 mmol m<sup>-2</sup> d<sup>-1</sup> (Fig 2 A).

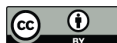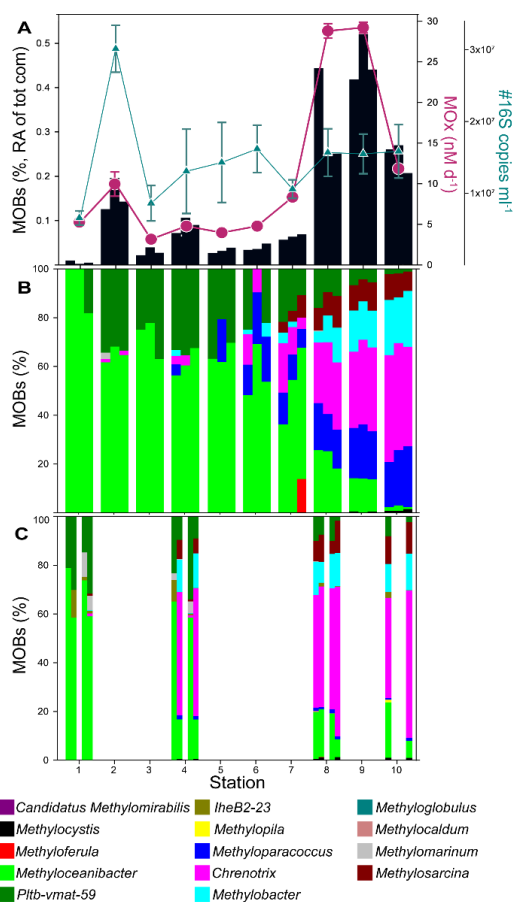

**Figure 3** A Relative abundance of MOB in total microbial community (%), methane oxidation rates (MOx) and abundance of 16S gene copies. B MOB community composition (%) in the water column and (C) in the sediments. Station 10 has biological replicates but technical replicates are absent.

16S gene copies of the total community was generally  $\sim 1-2 \times 10^7$  copies ml<sup>-1</sup> across most stations, with a peak at station 2 ( $3 \times 10^7$  copies ml<sup>-1</sup>).

30 The distribution of MOB genera differed between stations in the North Sea and the mixing zone (stations 1-7) versus the freshwater zone (stations 8-10; Fig. 3 B). Waters from stations 1-7 were dominated by members of the potential MOB *Methyloceanibacter* and to a lesser degree by members of the *Pltb-vmat-59* group. Upriver at stations 8, 9 and 10, the contribution of *Methyloparacoccus* and *Chrenotrix* and to a lesser degree of *Methylobacter* and *Methylosarcina* became increasingly more pronounced, while the contribution of MOB dominant in the marine and mixing zone declined.

35 In sediments, MOB followed the same abundance pattern as observed in the water column, with a clear dominance of *Methyloceanibacter* at station 1, while upriver (stations 8 and 10), this trend shifted with *Chrenotrix* emerging as the

*Nutrients, DIC, DOC* - The distribution of NO<sub>3</sub><sup>-</sup>, DIC and DOC concentration showed an apparent anticorrelation when compared to salinity with lowest values in the North Sea at station 1 (NO<sub>3</sub><sup>-</sup>: 8 μM, DIC: 2330 μM, DOC: 161 μM), and highest values at station 10 (NO<sub>3</sub><sup>-</sup>: 248 μM, DIC: 4087 μM, DOC: 488 μM; Fig A1 appendix A). Also NO<sub>2</sub><sup>-</sup> and PO<sub>4</sub><sup>3-</sup> followed this pattern with lowest concentrations at station 1 (NO<sub>2</sub><sup>-</sup>: 0.4 μM, PO<sub>4</sub><sup>3-</sup>: 0.2 μM). Yet, both nutrient types displayed a maximum at station 9 (NO<sub>2</sub><sup>-</sup>: 1.25 μM, PO<sub>4</sub><sup>3-</sup>: 4.8 μM). With regards to NH<sub>4</sub><sup>+</sup> concentration, two peaks were observed, one at station 3 (2 μM) and a second one at station 8 (4.2 μM), whereas values remained relatively constant in the mixing zone between stations 5-7 (0.4 μM).

### 3.2 Aerobic methane oxidation and methanotrophs

Methane oxidation rates (MOx) were always  $> 5$  nM d<sup>-1</sup> and highest with values of  $> 29$  nM d<sup>-1</sup> in Antwerp (stations 8 and 9; Fig 3 A). We also found a second smaller MOx peak close to the river mouth (station 2) with 10 nM d<sup>-1</sup>.

Mirroring the distribution of MOx, the relative abundance of water column MOB was highest at station 8 and 9 (accounting for  $\sim 0.5\%$  of all ASVs), and a second maximum with a relative abundance of  $\sim 0.2\%$  was encountered at station 2 (Fig 3 A). The number of

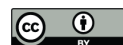

most dominant genus (Fig 3 C). All MOB types detected in the water column were also present in sediments, however, we additionally detected minor abundances of *Candidatus Methyloirabilis*, *Methylocystis*, *Methyloferula*, *IheB2-23*, *Methylophila*, *Methyloglobulus*, *Methylocaldum* and *Methylomarinum*.

### 3.3 Isotope fractionation of methanotrophy and methanogenesis

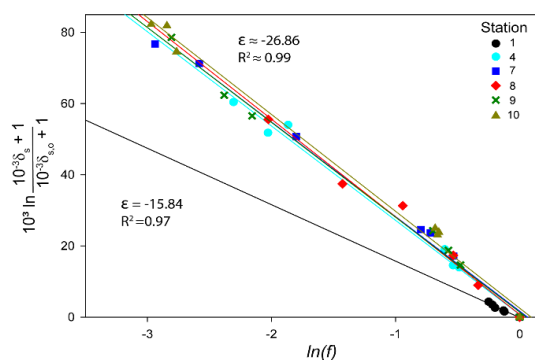

**Figure 4** Rayleigh plot of CH<sub>4</sub> data from the incubation of water column methanotrophs. *f* is the fraction of methane remaining (the ratio between the CH<sub>4</sub> concentration at the beginning of the incubation and at the end). Linear regressions are plotted through the different stations, and the slope  $\epsilon$  is equivalent to the isotope enrichment factor.

The amount of CH<sub>4</sub> in the headspace of closed incubations with river water decreased from 0.02 mmol to 0.002 mmol, while the corresponding  $\delta^{13}\text{C}-\text{CH}_4$  values increased from  $-39\%$  to approximately  $+20\%$ . Only incubations with water from Station 1 deviated from this pattern, only showing a minimal decrease in CH<sub>4</sub> concentrations, from 0.02 mmol at the start to 0.016 mmol at the end of the experiment. The  $\delta^{13}\text{C}-\text{CH}_4$  signature at this station increased only slightly, from  $-34\%$  to  $-32\%$ . The incubations were terminated after three days, by which time CH<sub>4</sub> concentrations were still sufficient for isotopic analysis. Apparent isotope fractionation ( $\epsilon$ ; Fig 4) was calculated using equation

1.3. Incubations with water from stations 2-10 showed comparable  $\epsilon$  values of  $-26.9\%$ . Fully marine waters (station 1) showed a markedly lower  $\epsilon$  value of  $-15.9\%$ ).

- 20 We only found CH<sub>4</sub> production during incubations with riverbed sediments at two stations. Here,  $\delta^{13}\text{C}$  measurements revealed CH<sub>4</sub> isotope signatures of  $-57.78\%$  at Station 8 and  $-46.5\%$  at Station 10.

## 4 Discussion

### 4.1 Methane distribution along the estuarine salinity gradient

- 25 CH<sub>4</sub> concentrations (52-184 nM) were consistently supersaturated relative to the atmospheric equilibrium (2.6-2.9 nM) throughout the estuary, directly showing that the river's surface waters are a source of CH<sub>4</sub> to the atmosphere. This observation aligns with previous publications from the Scheldt estuary reporting CH<sub>4</sub> concentrations in the range of 20-485 nM (Middelburg et al., 2002, Jaques et al., 2021). In fact, Jacques et al. (2021) observed highest CH<sub>4</sub> concentrations in the lower estuary near Vlissingen (95 nM; December 2015) and in the upper estuary near Antwerp
- 30 (303 nM; November 2016). In our study, the highest concentration was detected near the lower estuary (station 3, 184 nM) and a second maximum near Antwerp (station 10, 114 nM). CH<sub>4</sub> concentrations of Scheldt waters are similar to other European estuaries typically showing supersaturation with respect to the atmospheric equilibrium, too (Stanley et al., 2022). Concentrations in the river Elbe, for example, were found to amount to 4-111 nM, while 5-273 nM were found in the river Thames and 4-559 nM in the river Gironde (Middelburg et al., 2002). In the Lena Delta, CH<sub>4</sub>
- 35 concentrations were elevated nearshore and decreased with distance from the coast, ranging from 10 to 218 nM (Bussmann et al., 2017). Similar concentrations have also been documented in other European estuaries (Abril et al.,



2007; Upstill-Goddard et al., 2016; Matoušů et al., 2017; Stanley et al., 2022) suggesting similar types and strength of driving forces controlling CH<sub>4</sub> dynamics in these systems.

Our measurements show, moreover, that CH<sub>4</sub> concentrations did not exhibit a unidirectional trend along the estuary (i.e., a concentration gradient - increasing or decreasing – up- or downriver) and CH<sub>4</sub> concentrations did not follow the estuary's salinity gradient. This pattern has also been observed in the Elbe estuary (Matoušů et al., 2017) and other estuaries across Europe (Hackbusch et al., 2019; Upstill-Goddard and Barnes, 2016; Sánchez-Rodríguez et al., 2022). Even though some studies have reported decreasing CH<sub>4</sub> concentrations with increasing salinities (Rehder et al. 1998; Middelburg et al. 2002; Osudar et al. 2015), our data, together with previous results, challenge the paradigm that CH<sub>4</sub> and salinity are anticorrelated in estuaries. In contrast, our data rather suggest that local sources, including inputs from tributaries, sedimentary methanogenesis, and sinks such microbial oxidation and atmospheric efflux strongly modulate local CH<sub>4</sub> concentrations (de Groot et al., 2024). CH<sub>4</sub> dynamics in the Scheldt and potentially in other delta systems are thus not only governed by a two-endmember mixing comprising inflow from the upper river and export from the river mouth to the open sea with influences by tributaries and canals.

#### 4.2 Methane oxidation rates in the water column

Methane oxidation rates showed a non-linear distribution along the estuary, with lower values in the mixing zone and distinct peaks both in saline and freshwater regions (Fig 3 A). Our observation is consistent with findings from the German Bight and the Elbe estuary, where microbial communities are frequently exposed to salinity—largely due to tidal influence. Along the salinity gradient of the Elbe, methane oxidation rates have been reported to range from 0.8 nM d<sup>-1</sup> in the lower estuary to as high as about 5542 nM d<sup>-1</sup>, particularly at the Hamburg harbour (Matoušů et al., 2017). In the German Bight, the highest methane oxidation rates (2.6 nM d<sup>-1</sup>) were observed at coastal stations, whereas the lowest rates (0.4 nM d<sup>-1</sup>) were found at the marine stations (Osudar et al., 2015). Several studies, nevertheless, observed a negative correlation between salinity and methane oxidations, highlighting salinity as the major factor controlling MOx by affecting the composition and activity of methanotrophic communities (Poffenbarger et al., 2011; Ho et al., 2018; Zhang et al., 2023). Specifically, salinity has been described to inhibit methane oxidation in freshwater systems (de Angelis and Scranton, 1993) and is often attributed to osmotic stress on freshwater MOB (Osudar et al., 2017). In contrast, we found relatively high rates of MOx (up to 5 nM d<sup>-1</sup>) throughout the entire estuary, apparently independent of salinity. This consequently suggests that salinity changes are not necessarily inhibitory for methane oxidation. Similarly, more recent observations from the Wadden Sea (de Groot et al., 2023) and Svalbard (Steinle, et al., 2015) also showed that salinity changes seemed to have rather small effects on MOx and it has been suggested that methanotrophic communities may have adapted to such variabilities (de Groot et al., 2023, 2025; Zhang et al., 2023). Nevertheless, whether this pattern was related to an adaptation of specific MOB to variable salinity levels or to changes in the composition of the MOB community as a function of salinity variation was not investigated in previous studies.



#### 4.3 Methanotroph community shifts along the salinity gradient

Methanotrophs were detected throughout the entire Scheldt estuary, both in the water column and in sediment samples. However, we observed a clear shift in community structure along the salinity gradient: *Crenothrix*, *Methylobacter*, *Methyloparacoccus* and *Methylosarcina* in the upper, fresh water part of the estuary were successively supplanted by *Methyloceanibacter* and *Pltb-vmat-59* in the middle, brackish water section, while the marine endmember of the estuary water column was dominated by *Methyloceanibacter*. These shifts are likely driven by the differential sensitivity of MOB groups to a range of salinities, which was discussed to shape community composition of MOB (Osudar et al., 2017, Zhang et al., 2023) and broader prokaryote community structure in estuarine water columns (Wu et al., 2024). *Crenothrix* is indeed typically detected in freshwater systems (Yang et al., 2022) and *Methyloceanibacter* in marine waters (Vekeman et al., 2016; de Groot et al., 2024, 2025). Members of the *Methylobacter*, *Methyloparacoccus* and *Methylosarcina* genera have previously been found in brackish, coastal zones such as mangroves (Das et al., 2024) and the Dutch Wadden Sea (de Groot et al., 2025), but also in fully marine systems, e.g. cold seep systems (Tavormina et al., 2008) and sediments (Tavormina et al., 2015). *Pltb-vmat-59*, on the other hand, has mostly been found in marine waters (de Groot et al., 2024) and was also found as a dominant group in incubation experiments with North Sea waters (de Groot et al., 2025). Our findings of these genera in the upper – mid estuary, but not the lower, marine dominated sections of the estuary suggests that these groups may contain strains that are specifically adapted to brackish/freshwater conditions.

Absolute microbial abundance determined by 16S copy numbers together with the relative contribution of MOB to the prokaryote community indicates that the overall abundance of MOB remained relatively constant across the freshwater-marine transition. Note that this is only a rough approximation as the frequency of 16S operons per genome can vary between 1 up to 15 (Klappenbach et al., 2001). However, despite the differential water column MOB community composition, overall MOx was not substantially affected by salinity (see previous section), but instead followed MOB abundances. This suggest that salinity may indeed exert a selection pressure on the composition of the MOB community but that system-level MOx is determined by the abundance of MOB rather than their identity. It needs to be stressed, however, that this may be different for other environments. In incubations experiments, de Groot et al., (2025), for example, found that salinity had only a weak effect on MOB community composition. Other studies showed that elevated salinity often led to an immediate decrease in MOx in terrestrial/lacustrine systems (Ho et al., 2018; Zhang et al., 2023). Likewise, marine methanotrophs seem to function best at salinity levels of 20 psu (Osudar et al., 2017), while a sudden decrease in salinity can inhibit MOx (Hirayama et al., 2013; Tavormina et al., 2015).

Our data consequently show that salinity seemingly influence MOB community composition but not their overall activity, but that MOB abundance primarily governs overall MOx. Considering the current velocity of the Scheldt (~95 km d<sup>-1</sup>, Meire et al., 2005), a typical doubling time of MOB (~9 days, Mayr et al., 2020) and the length of the estuary investigated here (87 km) it seems unlikely that shifts in MOB composition are primarily driven by growth within the water column. However, given the presence of similar methanotrophs in both sediments and overlying waters, it is more plausible that the sediment community acts as a reservoir supplying MOB to the water column. Shear forces exerted by the river current likely cause resuspension and thus mobilisation of sedimentary MOB. Similar to resuspension caused by tidal currents (de Groot et al., 2023) and bubbles pecculating through sediments (Steinle et



al., 2015, Jordan et al., 2020, 2021), this could be a key driver in determining estuarine water column MOB communities in rivers.

#### 4.4 Isotopic signature along the Scheldt estuary

The  $^{13}\text{C}$ - $\text{CH}_4$  signatures measured along the Scheldt estuary are consistent with a predominantly microbial methane source (Whiticar, 1999) and match the isotopic composition of newly produced methane in our sediment incubation experiments (Fig 4). Previous investigations, however, reported unusually heavy  $\delta^{13}\text{C}$ - $\text{CH}_4$  values of up to  $-25\text{‰}$  in the upper Scheldt estuary (Jacques *et al.*, 2021), whereas our maximum  $\delta^{13}\text{C}$ - $\text{CH}_4$  value was  $-46\text{‰}$ . We cannot fully explain this discrepancy. Based on  $\text{CH}_4$  concentration and isotopic composition, Jacques *et al.* (2021) estimated an  $\epsilon$ -value for water column MOx of  $-12.8\text{‰}$ . Considering this and their  $\text{CH}_4$  concentration and associated  $\delta^{13}\text{C}$ -values, they concluded that  $\sim 80\%$  of the methane must have been oxidized by MOB to account for such enrichment. Our experimental measurements, in contrast, yielded MOx-related  $\epsilon$ -values of  $\sim -26.9\text{‰}$ .

Considering the highest  $\text{CH}_4$  concentration and associated  $\delta^{13}\text{C}$ -value measured here (180 nM and  $-64.6\text{‰}$ ; Fig 2 C, B), we re-calculated that about 50% of the  $\text{CH}_4$  had been consumed to account for the observed isotope enrichment. However, these theoretical  $\text{CH}_4$  consumption estimates are in stark contrast when compared to our  $\text{CH}_4$  budget of the Scheldt estuary (see next section below). Our  $\text{CH}_4$  budget combines ex situ MOx rate measurements and direct  $\text{CH}_4$  efflux measurements and indicates that only  $\sim 1\%$  of  $\text{CH}_4$  was consumed in the water column. We cannot fully explain the discrepancy between  $\text{CH}_4$  isotope dynamics and direct measurements of consumption. However, isotope signatures can integrate metabolic processes over larger spatial and temporal scales (Parnell et al., 2010). It seems hence likely that the observed signatures are inherited from riverine oxidation processes upstream of the city of Antwerp. Additionally, the  $\text{CH}_4$  source isotopic composition might likely be variable along the river. This is also indicated by the change in the  $\text{CH}_4$   $\delta^{13}\text{C}$ -values, rapidly dropping from about  $-46\text{‰}$  in the city of Antwerp to  $< -60\text{‰}$  just downstream of the city (station 7). This spatial trend agrees with the overall pattern reported previously (Jacques et al., 2021; note that absolute isotopic values differed in the previous and our study). The observed shift suggests a transition from a relatively  $^{13}\text{C}$ -enriched methanogenic substrate to a lighter one or, alternatively, a change in methanogen community composition and associated methanogenic pathways and/or isotope fractionation (Krzycki *et al.*, 1987; Whiticar, 1999; Gropp, 2022). Finally, MOx in the estuary might have been considerably higher during the sampling period of Jacques *et al.* (2021), leading to stronger enrichment of the residual  $\text{CH}_4$  in  $^{13}\text{C}$  (Whiticar, 1999; Jacques *et al.*, 2021).

#### 4.5 Fluxes and budget

By applying an area-weighted extrapolation of  $\text{CH}_4$  fluxes from the ten, roughly equidistant floating chamber stations we estimate a mean methane efflux to the atmosphere of approximately  $4\text{ mmol m}^{-2}\text{ d}^{-1}$  across the entire Scheldt estuary. This is well within the range of previous reports from other estuaries (Tab. 1).



Table 1. Efflux of methane in estuaries inside and outside Europe

| River                   | Efflux ( $\text{mmol m}^{-2} \text{d}^{-1}$ ) | Reference                        |
|-------------------------|-----------------------------------------------|----------------------------------|
| Danube                  | $1.176 \pm 1.464$                             | Canning et al., 2021             |
| Guadalquivir            | 0.12                                          | Sanchez et al., 2022             |
| Randers Fjord           | 0.02-0.4*                                     | Abril and Iversen (2002)         |
| Temmesjoki, Finland     | 1.6*                                          | Silvennoinen et al. (2008)       |
| Río San Pedro           | 0.08*                                         | Ferrón et al. (2007)             |
| Ria de Vigo             | 0.003*                                        | Kitidis et al. (2007)            |
| Tay                     | 0.05*                                         |                                  |
| Tees                    | 0.5*                                          |                                  |
| Tyne                    | 1.3*                                          | Upstill-Goddard and Barnes, 2016 |
| Tamar                   | 0.3*                                          |                                  |
| Forth                   | 0.2*                                          |                                  |
| Humber                  | 0.03*                                         |                                  |
| White Oak River estuary | 17.1                                          | Kelley et al., 1990              |
| Yangtze estuary         | 0.003-0.4                                     | Zhang et al., 2008               |
| German Bight            | 0.003-0.277                                   | Bussmann et al., 2021            |

\* recalculated from annual averages

Per unit area, many estuaries thus emit >10-fold more  $\text{CH}_4$  to the atmosphere when compared to fully marine coastal zones (Rosentreter et al., 2023). For example, methane efflux from the highly active seeps in the Belgium coastal zone were found to range between 0.001–0.4  $\text{mmol m}^{-2} \text{d}^{-1}$  (Borges et al., 2016). Similarly, the highly active cold seeps at the Doggerbank in the North Sea were found to emit between 0.06 to 0.18  $\text{mmol m}^{-2} \text{d}^{-1}$  (de Groot et al., 2024). In deeper continental shelf systems,  $\text{CH}_4$  bubbles exchange gas with the adjacent water during their rise (Gentz et al., 2014; Leifer & Patro, 2002; McGinnis et al., 2006). For example, a pure methane bubble of ~5 mm diameter rising from 40 m water depth will have lost ~50 % of its methane content before breaking the surface (McGinnis et al., 2006). The dissolved  $\text{CH}_4$  can then be removed through microbial oxidation and advective transport can translocate and further disperse the  $\text{CH}_4$  (Abril & Iversen, 2002; von Deimling et al., 2011; James et al., 2016; de Groot et al., 2024). In contrast, in shallow systems such as estuaries and tidal flats, bubbles emitted from sediments may only exchange a minor fraction of their gas content during their ascent (de Groot et al., 2023; McGinnis et al., 2006). In addition, rivers are typically not stratified and characterized by turbulent mixing so that dissolved gases are rapidly exchanged with the atmosphere.

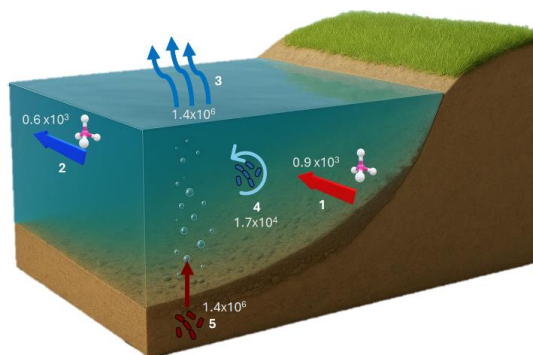

**Figure 5** (Generated with AI) Methane budget for the Scheldt estuary ( $\text{mol d}^{-1}$ ) is calculated based on the area between the 10 stations. 1 influx from Antwerp (into the estuary) 2 outflow into the North Sea 3 methane efflux 4 methane oxidation 5 methane liberation from the sediments

Towards a rough estimation of a  $\text{CH}_4$  budget of the Scheldt estuary, we integrated efflux data as determined from our floating chamber measurements, ex situ MOx measurements and methane concentration data as well as estimates of water volume and flow velocity (Fig 5, see also appendix A table A1). With respect to the **volume flux of the river** at Antwerp ( $100 \text{ m}^3 \text{ s}^{-1}$ , Waterinfo Vlaanderen) and the  $\text{CH}_4$  concentration of  $114 \text{ nM}$  measured here (station 10), we estimate an input of  $\text{CH}_4$  from upriver to the city of Antwerp ( $F_{\text{in}}$ ) of  $985 \text{ mol CH}_4 \text{ d}^{-1}$ , at least during the time period of our observations (Fig 5). Similarly, considering the river's discharge ( $110 \text{ m}^3 \text{ s}^{-1}$ , Rijkswaterstaat) and our measured

$\text{CH}_4$  concentration of  $71 \text{ nM}$  (station 1),  **$\text{CH}_4$  export into the North Sea** ( $F_{\text{out}}$ ) is  $\sim 674 \text{ mol CH}_4 \text{ d}^{-1}$ . Along the flow path, we divided the estuary between the measurement stations in equidistant sections (Fig 1). Considering areal  $\text{CH}_4$  efflux measurements ( $0.2\text{-}12.7 \text{ mmol m}^{-2} \text{ d}^{-1}$ ) and the surface areas of the sections ( $5\text{-}61 \text{ km}^2$ ), approximately  $1.4 \times 10^6 \text{ mol CH}_4 \text{ d}^{-1}$  are released to the atmosphere ( $J_{\text{atm}}$ ). Similarly, our MOx ( $3.2\text{-}29.2 \text{ nM d}^{-1}$ ) measurements and the volume of each section ( $1.8 - 8.5 \times 10^{11} \text{ m}^3$ ) translate to a total  $\text{CH}_4$  consumption ( $MOx_{\text{tot}}$ ) of  $\sim 1.7 \times 10^4 \text{ mol CH}_4 \text{ d}^{-1}$ . Hence, considering all input and output terms for  $\text{CH}_4$  as outlined above, the amount of  $\text{CH}_4$  supplied to the estuary from sediment methanogenesis ( $MOg_{\text{tot}}$ ) can be calculated as:

$$MOg_{\text{tot}} = J_{\text{atm}} + MOx_{\text{tot}} + F_{\text{out}} - F_{\text{in}} \quad \text{eq 1.4}$$

We estimated that  $MOg_{\text{tot}}$  amounts to  $1.4 \times 10^6 \text{ mol CH}_4 \text{ d}^{-1}$ .

Overall, these results suggest that most of the methane in the Scheldt estuary is released to the atmosphere, while only a minor fraction is transported toward the adjacent coastal marine environment and consumed within the water column.

Also, only a minor fraction of the estuary's methane originates from upriver, while most is produced in the estuary's sediments.

## 5 Summary and Conclusions

The Scheldt estuary is a transitional environment characterized by a pronounced salinity gradient that divides the system into three distinct zones, ranging from freshwater in the upper estuary to fully marine conditions near the estuarine mouth. Our study revealed substantial spatial variations in methane dynamics that are not directly related to the salinity gradient. Salinity appears to be an important selection factor for MOB. This suggests that estuarine sediments not only serve as a critical habitat for methanotrophic communities but also play a key role in sustaining and replenishing the MOB population in the overlying water column. Nevertheless, the MOx filter capacity in estuaries seems to be limited only retaining a minor fraction of  $\text{CH}_4$ , while most is released to the atmosphere. Furthermore, our and previous observations show that  $\text{CH}_4$  in the upper estuary was unusually enriched in  $^{13}\text{C}$ , indicating that these isotopic signatures are likely inherited from riverine oxidation processes occurring upstream. Nevertheless, temporally



differential CH<sub>4</sub>-isotope compositions suggests that seasonal variability strongly influences CH<sub>4</sub> production and oxidation dynamics.

5 *Data availability.* All data will be archived and made publicly available in the database DAS (Data Archive System, XXX).

*Supplement.* The supplement related to this article is available online at: XX.

10 *Author contributions.* The study was designed by AD, TR and HN. On-board sampling was performed by AD, DJBF, JK, DM and HN. Further geochemical analysis was conducted by AD, CV, SO and KB. Microbial rates were measured by AD and HN. Molecular analyses were performed by AD. HN supervised the research project. The paper was prepared by AD with input from all authors.

15 *Acknowledgements.* Our gratitude goes to the captain and crew of R/V Navicula as well as the staff of the geochemical, radioisotope and molecular laboratories at NIOZ (Sharyn Ossebaar, Maartje Brouwer, Judith van Bleijswijk Tierens Verhagen, Karel Bakker, Ronald van Bommel, Jort Ossebaar and Marcel van der Meer) and IMAU (Carina van der Veen), for their exceptional support. We would also like to extend our appreciation to Eric Wagemakers for regularly calibrating the CTD. We acknowledge the Utrecht Sequencing Facility (USEQ) for providing sequencing service and data. USEQ is subsidized by the University Medical Center Utrecht and The Netherlands X-omics Initiative (NWO project 184.034.019).

20

25

30



## Appendix A

Table A1. Water flow from Antwerp  $100 \text{ m}^3 \text{ s}^{-1}$ , water flow to the North Sea  $110 \text{ m}^3 \text{ s}^{-1}$ . With respect to individual measurements:  $F_{\text{in}}$  is  $985 \text{ mol CH}_4 \text{ d}^{-1}$ ,  $F_{\text{out}}$  is  $674 \text{ mol CH}_4 \text{ d}^{-1}$ ,  $J_{\text{atm}}$  is  $1.4 \times 10^6 \text{ mol CH}_4 \text{ d}^{-1}$ ,  $MO_{\text{X}_{\text{tot}}}$  is  $1.7 \times 10^4 \text{ mol CH}_4 \text{ d}^{-1}$ ,  $MO_{\text{G}_{\text{tot}}}$  is  $1.4 \times 10^6 \text{ mol CH}_4 \text{ d}^{-1}$ .

| Station | km <sup>2</sup> | m <sup>3</sup> | CH <sub>4</sub> (nM) | MO <sub>x</sub> (nM d <sup>-1</sup> ) | Efflux (mmol m <sup>-2</sup> d <sup>-1</sup> ) |
|---------|-----------------|----------------|----------------------|---------------------------------------|------------------------------------------------|
| 10      | 4.94            | 31139580       | 114.0 ± 1.4          | 11.8 ± 0.2                            | 3.4                                            |
| 9       | 7.12            | 29690140       | 101.4 ± 1.9          | 29.2 ± 0.7                            | 1.5                                            |
| 8       | 8.33            | 85257713       | 52.2 ± 1.4           | 28.8 ± 0.9                            | 0.9                                            |
| 7       | 16.33           | 169022630      | 57.6 ± 0.9           | 8.3 ± 0.1                             | 5.5                                            |
| 6       | 17.82           | 179336603      | 56.3 ± 0             | 4.8 ± 0.3                             | 2                                              |
| 5       | 31.94           | 248137846      | 60.3 ± 0.5           | 3.9 ± 0.1                             | 2.4                                            |
| 4       | 43.58           | 435557352      | 91.6 ± 1.7           | 4.8 ± 0.2                             | 6.3                                            |
| 3       | 60.80           | 658437303      | 184.1 ± 1.9          | 3.2 ± 0.2                             | 12.7                                           |
| 2       | 24.47           | 417182404      | 140.5 ± 2.8          | 9.9 ± 1.5                             | 4.7                                            |
| 1       | 36.83           | 432399513      | 70.9 ± 2.5           | 5.4 ± 0.4                             | 0.2                                            |

5

10

15

20

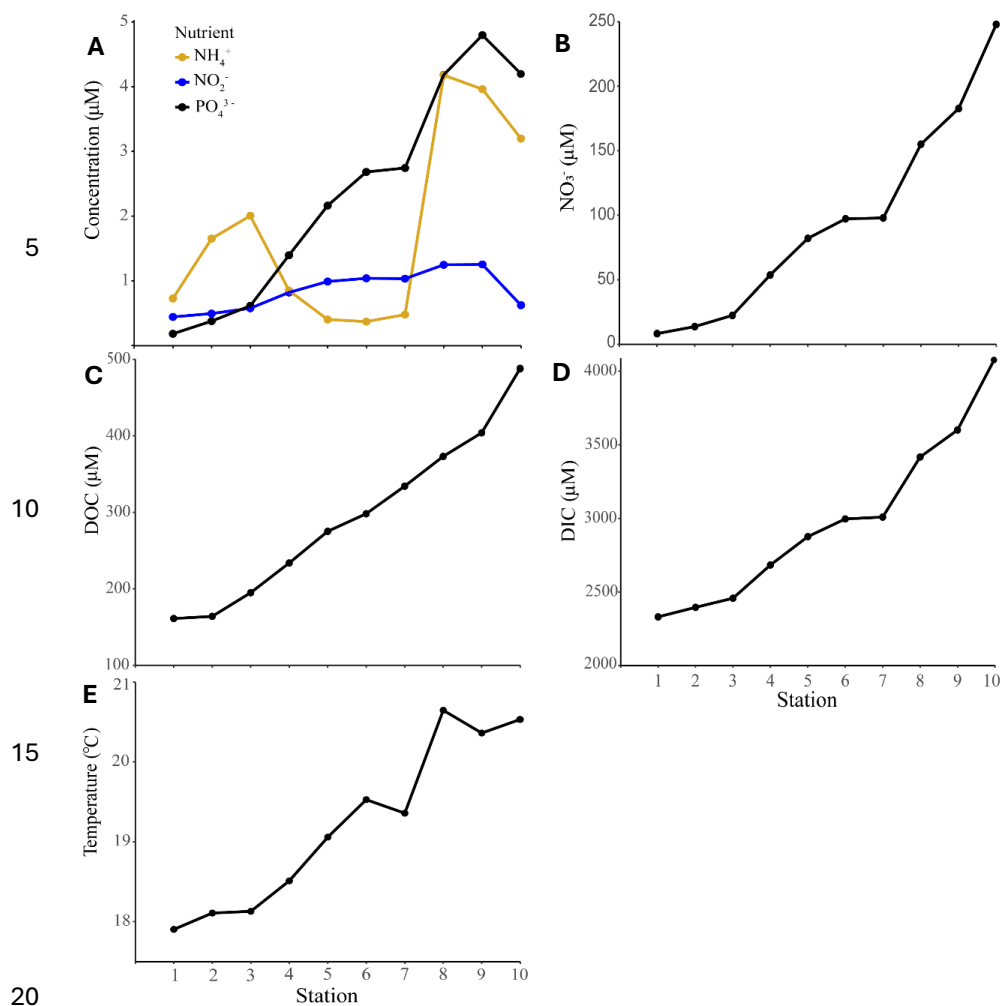

**Figure A1.** Properties of water column along the Scheldt Estuary. **A and B** Concentrations in  $\mu\text{M}$  of nutrients ( $\text{NH}_4^+$ ,  $\text{NO}_2^-$ ,  $\text{PO}_4^{3-}$  and  $\text{NO}_3^-$ ; **C and D** DOC and DIC in  $\mu\text{M}$  **E** Temperature.

25



## References

- Abdala Asbun, A., Besseling, M. A., Balzano, S., Van Bleijswijk, J. D., Witte, H. J., Villanueva, L., and Engelmann, J. C. Cascabel: a scalable and versatile amplicon sequence data analysis pipeline delivering reproducible and documented results. *Frontiers in Genetics*, 11, 489357, <https://doi.org/10.3389/fgene.2020.489357>, 2020.
- 5 Abril, G. and Iversen, N., Methane dynamics in a shallow, nontidal estuary (Randers Fjord, Denmark). *Mar. Ecol. Prog. Ser.* 230, 171–181, <https://doi.org/10.3354/meps>, 2002.
- Abril, G., and Borges, A. V. Carbon dioxide and methane emissions from estuaries. In A. Tremblay, L. Varfalvy, C. Roehm, & M. Garneau (Eds.), *Greenhouse gas emissions: fluxes and processes, hydroelectric reservoirs and natural environments*, 187–207, [https://doi.org/10.1007/3-540-26643-7\\_7](https://doi.org/10.1007/3-540-26643-7_7), 2004.
- 10 Abril, G., Commarieu, M. V., & Guérin, F. Enhanced methane oxidation in an estuarine turbidity maximum. *Limnology and oceanography*, 52(1), 470-475, <https://doi.org/10.4319/lo.2007.52.1.0470>, 2007.
- Borges, A. V., Champenois, W., Gypens, N., Delille, B., & Harlay, J. Massive marine methane emissions from near-shore shallow coastal areas. *Scientific reports*, 6(1), 27908, doi: 10.1038/srep27908, 2016.
- 15 Brass, M., and Röckmann, T.: Continuous-flow isotope ratio mass spectrometry method for carbon and hydrogen isotope measurements on atmospheric methane, *Atmos. Meas. Tech.*, 3, 1707-1721, <https://doi.org/10.5194/amt-3-1707-2010>, 2010.
- Brown, A. M., Bass, A. M., & Pickard, A. E. Anthropogenic-estuarine interactions cause disproportionate greenhouse gas production: A review of the evidence base. *Marine Pollution Bulletin*, 174, 113240, <https://doi.org/10.1016/j.marpolbul.2021.113240>, 2022.
- 20 Bussmann, I., Hackbusch, S., Schaal, P., and Wichels, A.: Data to: Methane concentration and oxidation in the Lena Delta, available at: <https://doi.org/10.1594/PANGAEA.868494> (last access: November 2017), 2016.
- Bussmann, I., Brix, H., Flöser, G., Ködel, U., & Fischer, P. Detailed patterns of methane distribution in the German Bight. *Frontiers in Marine Science*, 8, 728308, <https://doi.org/10.3389/fmars.2021.728308>, 2021.
- 25 Canadell, J. G., Monteiro, P. M. S., Costa, M. H., Cotrim da Cunha, L., Cox, P. M., Eliseev, A. V., Henson, S., Ishii, M., Jaccard, S., Koven, C., Lohila, A., Patra, P. K., Piao, S., Rogelj, J., Syampungani, S., Zaehle, S., and Zickfeld, K.: Global Carbon and other Biogeochemical Cycles and Feedbacks, in: *Climate Change 2021: The Physical Science Basis. Contribution of Working Group I to the Sixth Assessment Report of the Intergovernmental Panel on Climate Change*, edited by: Masson-Delmotte, V., Zhai, P., Pirani, A., Connors, S. L., Péan, C., Berger, S., Caud, N., Chen, Y., Goldfarb, L., Gomis, M. I., Huang, M., Leitzell, K., Lonnoy, E., Matthews, J. B. R., Maycock, T. K.,
- 30 Waterfield, T., Yelekçi, O., Yu, R., and Zhou, B., Cambridge University Press, 673–816, <https://doi.org/10.1017/9781009157896.007>, 2021.
- Canning, A., Wehrli, B., & Körtzinger, A. Methane in the Danube Delta: the importance of spatial patterns and diel cycles for atmospheric emission estimates. *Biogeosciences*, 18(12), 3961-3979, <https://doi.org/10.5194/bg-18-3961-2021>, 2021.
- 35 Ciais, P., Sabine, C., Bala, G., Bopp, L., Brovkin, V., Canadell, J., Chhabra, A., DeFries, R., Galloway, J., Heimann, M., Jones, C., Le Quéré, C., Myneni, R. B., Piao, S., and Thornton, P.: Carbon and Other Biogeochemical Cycles, in *Climate Change 2013: The Physical Science Basis. Contribution of Working Group I to the Fifth Assessment Report of IPCC*, edited by: Stocker, T. F., Qin, D., Plattner, G.-K., Tignor, M., Allen, S. K., Boschung, J., Nauels, A., Xia, Y., Bex, V., and Midgley, P. M., Cambridge University Press, Cambridge, ISBN 978-1-107-05799-1, 2013.



- Das, B. K., Chakraborty, H. J., Kumar, V., Rout, A. K., Patra, B., Das, S. K., & Behera, B. K. Comparative metagenomic analysis from Sundarbans ecosystems advances our understanding of microbial communities and their functional roles. *Scientific Reports*, 14(1), 16218, <https://doi.org/10.1038/s41598-024-67240-1>, 2024.
- de Angelis, M. A. and Scranton, M. I. Fate of methane in the Hudson River and estuary. *Global Biogeochemical Cycles*, 7(3), 509-523, <https://doi.org/10.1029/93GB01636>, 1993.
- de Groot, T.R., Mol, A.M., Mesdag, K., Ramond, P., Ndhlovu, R., Engelmann, J.C., Röckmann, T. and Niemann, H., Diel and seasonal methane dynamics in the shallow and turbulent Wadden Sea. *Biogeosciences*, 20(18), pp.3857-3872., <https://doi.org/10.5194/bg-20-3857-2023>, 2023.
- de Groot, T.R., Menoud, M., van Bleijswijk, J., van Leeuwen, S.M., van der Molen, J., Hernando-Morales, V., Czerski, H., Maazallahi, H., Walter, S., Rush, D. and Röckmann, T., Tidal and seasonal influence on cold seep activity and methanotroph efficiency in the North Sea. *Communications Earth & Environment*, 5(1), p.368, <https://doi.org/10.25850/nioz/7b.b.jh>, 2024.
- de Groot, T. R., Engelmann, J. C., Ramond, P., Diorgio, J., van Bleiswijk, J., & Niemann, H., Adaptation of methane oxidising bacteria to environmental changes: implications for coastal methane dynamics. *EGUsphere*, 1-21, <https://doi.org/10.5194/egusphere-2025-316>, 2025.
- von Deimling, J.S., Rehder, G., Greinert, J., McGinnis, D.F., Boetius, A. and Linke, P., Quantification of seep-related methane gas emissions at Tommeliten, North Sea. *Continental Shelf Research*, 31(7-8), pp.867-878, <https://doi.org/10.1016/j.csr.2011.02.012>, 2011.
- Delre, A., Goudriaan, M., Morales, V.H., Vaksmaa, A., Ndhlovu, R.T., Baas, M., Keijzer, E., de Groot, T., Zeghal, E., Egger, M. and Röckmann, T., Plastic photodegradation under simulated marine conditions. *Marine Pollution Bulletin*, 187, p.114544, <https://doi.org/10.1016/j.marpolbul.2022.114544>, 2023.
- Dumestre, J. F., Guézennec, J., Galy-Lacaux, C., Delmas, R., Richard, S., & Labroue, L. Influence of light intensity on methanotrophic bacterial activity in Petit Saut Reservoir, French Guiana. *Applied and environmental microbiology*, 65(2), 534-539, <https://doi.org/10.1128/AEM.65.2.534-539.1999>, 1999.
- Etmianan, M., Myhre, G., Highwood, E. J., and Shine, K. P.: Radiative forcing of carbon dioxide, methane, and nitrous oxide: A significant revision of the methane radiative forcing, *Geophys. Res. Lett.*, 43, 12614–12623, <https://doi.org/10.1002/2016gl071930>, 2016.
- Ferrón, S., Ortega, T., Gómez-Parra, A., Forja, J.M.,. Seasonal study of dissolved CH<sub>4</sub>, CO<sub>2</sub> and N in a shallow tidal system of the Bay of Cádiz (SW Spain). *J. Mar. Syst.* 66, 244–257, <https://doi.org/10.1016/j.jmarsys.2006.03.021>, 2007.
- Fluet-Chouinard, E., Stocker, B.D., Zhang, Z., Malhotra, A., Melton, J.R., Poulter, B., Kaplan, J.O., Goldewijk, K.K., Siebert, S., Minayeva, T. and Hugelius, G.. Extensive global wetland loss over the past three centuries. *Nature*, 614(7947), pp.281-286, <https://doi.org/10.5281/zenodo.7293597>, 2023.
- Gentz, T., Damm, E., von Deimling, J. S., Mau, S., McGinnis, D. F., & Schlüter, M. A water column study of methane around gas flares located at the West Spitsbergen continental margin. *Continental Shelf Research*, 72, 107-118, <https://doi.org/10.1016/j.csr.2013.07.013>, 2014.
- Grasshoff, P., *Methods of seawater analysis*. Verlag Chemie. FRG, 419, pp.61-72, 1983.
- Green, J. D.: Headspace analysis Static, in: *Encyclopedia of Analytical Science (Second Edition)*, edited by: Worsfold, P., Townshend, A., and Poole, C., Elsevier, Oxford, 229–236, <https://doi.org/10.1016/B0-12-369397-7/00254-5>, 2005.



- Groffen, T., Schoutens, K., Zamora, J. D., Gourgue, O., Bervoets, L., & Temmerman, S. (2025). Spatial distribution of per-and polyfluoroalkyl substances (PFAS) in natural and restored intertidal wetlands in the Scheldt estuary. *Journal of Hazardous Materials*, 139247.
- 5 Gropp, J., Jin, Q. & Halevy, I. Controls on the isotopic composition of microbial methane. *Sci. Adv.* **8**, eabm5713 (2022).
- Guérin, F., & Abril, G. (2007). Significance of pelagic aerobic methane oxidation in the methane and carbon budget of a tropical reservoir. *Journal of Geophysical Research: Biogeosciences*, 112(G3).
- Hackbusch, S., Wichels, A., & Bussmann, I. (2019). Abundance, activity and diversity of methanotrophic bacteria in the Elbe Estuary and southern North Sea. *Aquatic microbial ecology*, 83(1), 35-48.
- 10 Helder, W., & De Vries, R. T. P. (1979). An automatic phenol-hypochlorite method for the determination of ammonia in sea-and brackish waters. *Netherlands Journal of Sea Research*, 13(1), 154-160.
- Hirayama, H., Fuse, H., Abe, M., Miyazaki, M., Nakamura, T., Nunoura, T., Furushima, Y., Yamamoto, H., and Takai, K.: *Methylomarinum vadi* gen. nov., sp. nov., a methanotroph isolated from two distinct marine environments, *Int. J. Syst. Evol. Microb.*, 63, 1073–1082, <https://doi.org/10.1099/ijs.0.040568-0>, 2013.
- 15 Ho, A., Mo, Y., Lee, H. J., Sauheith, L., Jia, Z., and Horn, M. A.: Effect of salt stress on aerobic methane oxidation and associated methanotrophs; a microcosm study of a natural community from a non-saline environment, *Soil Biol. Biochem.*, 125, 210–214, <https://doi.org/10.1016/j.soilbio.2018.07.013>, 2018.
- Jacques, C., Gkritzalis, T., Tison, J.-L., Hartley, T., van der Veen, C., Röckmann, T., Middelburg, J. J., Cattrijsse, A., Egger, M., Dehairs, F., and Sapart, C. J.: Carbon and Hydrogen Isotope Signatures of Dissolved Methane in the Scheldt Estuary, *Estuar. Coasts*, 44, 137–146, <https://doi.org/10.1007/s12237-020-00768-3>, 2021.
- 20 Jakobs, G., Rehder, G., Jost, G., Kießlich, K., Labrenz, M., & Schmale, O. (2013). Comparative studies of pelagic microbial methane oxidation within the redox zones of the Gotland Deep and Landsort Deep (central Baltic Sea). *Biogeosciences*, 10(12), 7863-7875.
- James, R. H., Bousquet, P., Bussmann, I., Haeckel, M., Kipfer, R., Leifer, I., Niemann, H., Ostrovsky, I., Piskozub, J., Rehder, G., Treude, T., Vielstädte, L., and Greinert, J.: Effects of climate change on methane emissions from seafloor sediments in the Arctic Ocean: A review, *Limnol. Oceanogr.*, 61, 283–299, <https://doi.org/10.1002/lno.10307>, 2016.
- Jordan, S. F. A., Treude, T., Leifer, I., Janssen, R., Werner, J., Schulz-Vogt, H., and Schmale, O.: Bubble-mediated transport of benthic microorganisms into the water column: Identification of methanotrophs and implication of seepage intensity on transport efficiency, *Sci. Rep.*, 10, 4682, <https://doi.org/10.1038/s41598-020-61446-9>, 2020.
- 30 Jordan, S. F. A., Gräwe, U., Treude, T., van der Lee, E. M., Schneider von Deimling, J., Rehder, G., and Schmale, O.: Pelagic Methane Sink Enhanced by Benthic Methanotrophs Ejected From a Gas Seep, *Geophys. Res. Lett.*, 48, e2021GL094819, <https://doi.org/10.1029/2021GL094819>, 2021.
- Kelley, C.A., Martens, C.S., Chanton, J.P., Variations in sedimentary carbon remineralization rates in the White Oak River estuary, North Carolina. *Limnology and Oceanography* 35, 372–38, <https://doi.org/10.4319/lo.1990.35.2.0372>, 1990.
- 35 Kitidis, V., Tizzard, L., Uher, G., Judd, A., Upstill-Goddard, R.C., Head, I.M., Gray, N.D., Taylor, G., Durán, R., Diez, R., Iglesias, J., García-Gil, S., The biogeochemical cycling of methane in ria De Vigo, NW Spain: sediment processing and sea–air exchange. *J. Mar. Syst.* 66, 258–271, <https://doi.org/10.1016/j.jmarsys.2006.03.022>, 2007.



- Klappenbach, J. A., Saxman, P. R., Cole, J. R., & Schmidt, T. M. rrrdb: the ribosomal RNA operon copy number database. *Nucleic acids research*, 29(1), 181-184, <https://doi.org/10.1093/nar/29.1.181>, 2001.
- Knief, C.: Diversity and Habitat Preferences of Cultivated and Uncultivated Aerobic Methanotrophic Bacteria Evaluated Based on pmoA as Molecular Marker, *Front. Microb.*, 6, 1346, <https://doi.org/10.3389/fmicb.2015.01346>, 2015.
- 5
- Krzycki, J. A., Kenealy, W. R., DeNiro, M. J. & Zeikus, J. G. Stable Carbon Isotope Fractionation by *Methanosarcina barkeri* during Methanogenesis from Acetate, Methanol, or Carbon Dioxide-Hydrogen. *Appl. Environ. Microbiol.* **53**, 2597–2599, <https://doi.org/10.1128/aem.53.10.2597-2599.1987>, 1987.
- Lan, X., Thoning, K. W., and Dlugokencky, E. J.: Trends in globally-averaged CH<sub>4</sub>, N<sub>2</sub>O, and SF<sub>6</sub> determined from NOAA Global Monitoring Laboratory measurements Version 2024-02, Global Monitoring Laboratory [data set], <https://doi.org/10.15138/P8XG-AA10>, 2024.
- 10
- Legg, S., IPCC, 2021: Climate change 2021-the physical science basis. *Interaction*, 49(4), pp.44-45, 2021.
- Leifer, I. and Patro, R. K. The bubble mechanism for methane transport from the shallow sea bed to the surface: a review and sensitivity study. *Cont. Shelf Res.* **22**, 2409–2428, [https://doi.org/10.1016/S0278-4343\(02\)00065-1](https://doi.org/10.1016/S0278-4343(02)00065-1), 2002.
- 15
- Lofton, D., Whalen, S., and Hershey, A.: Effect of temperature on methane dynamics and evaluation of methane oxidation kinetics in shallow Arctic Alaskan lakes, *Hydrobiologia*, 721, 209–222, <https://doi.org/10.1007/s10750-013-1663-x>, 2014.
- Mayr, M. J., Zimmermann, M., Dey, J., Brand, A., Wehrli, B., & Bürgmann, H. Growth and rapid succession of methanotrophs effectively limit methane release during lake overturn. *Communications biology*, 3(1), 108, <https://doi.org/10.1038/s42003-020-0838-z>, 2020.
- 20
- Mao, S.-H., Zhang, H.-H., Zhuang, G.-C., Li, X.-J., Liu, Q., Zhou, Z., Wang, W.-L., Li, C.-Y., Lu, K.-Y., Liu, X.-T., Montgomery, A., Joye, S. B., Zhang, Y.-Z., & Yang, G.-P. Aerobic oxidation of methane significantly reduces global diffusive methane emissions from shallow marine waters. *Nature Communications*, 13, 7309. <https://doi.org/10.1038/s41467-022-35082-y>, 2022.
- 25
- Matoušů, A., Osudar, R., Šimek, K., & Bussmann, I. Methane distribution and methane oxidation in the water column of the Elbe estuary, Germany. *Aquatic Sciences*, 79(3), 443-458, <https://doi.org/10.1007/s00027-016-0509-9>, 2017.
- Mau, S., Bleses, J., Helmke, E., Niemann, H., and Damm, E.: Vertical distribution of methane oxidation and methanotrophic response to elevated methane concentrations in stratified waters of the Arctic fjord Storfjorden (Svalbard, Norway), *Biogeosciences*, 10, 6267–6278, <https://doi.org/10.5194/bg-10-6267-2013>, 2013.
- 30
- McGinnis, D. F., Greinert, J., Artemov, Y., Beaubien, S. E. & Wuest, A. Fate of rising methane bubbles in stratified waters: How much methane reaches the atmosphere ? *J. Geophys. Res.* **111**, 1–15, <https://doi.org/10.1029/2005JC003183>, 2006.
- 35
- Meire, P., Ysebaert, T., Damme, S. V., Bergh, E. V. D., Maris, T., & Struyf, E. (2005). The Scheldt estuary: a description of a changing ecosystem. *Hydrobiologia*, 540, 1-11, <https://doi.org/10.1007/s10750-005-0896-8>, 2005.
- Middelburg, J. J., Nieuwenhuize, J., Iversen, N., Høgh, N., de Wilde, H., Helder, W., Seifert, R., and Christof, O.: Methane distribution in European tidal estuaries, *Biogeochemistry*, 59, 95–119, <https://doi.org/10.1023/A:1015515130419>, 2002.



- Murase, J., and Sugimoto, A. Inhibitory effect of light on methane oxidation in the pelagic water column of a mesotrophic lake (Lake Biwa, Japan). *Limnology and oceanography*, 50(4), 1339-1343, <https://doi.org/10.4319/lo.2005.50.4.1339>, 2005.
- 5 Murphy, J. and Riley, J.P., A modified single solution method for the determination of phosphate in natural waters. *Analytica chim. Acta*, 27, p31-36, 1962
- Niemann, H., Steinle, L., Bleses, J., Bussmann, I., Treude, T., Krause, S., Elvert, M., and Lehmann, M. F.: Toxic effects of lab-grade butyl rubber stoppers on aerobic methane oxidation, *Limnol. Oceanogr.-Meth.*, 13, 40–52, <https://doi.org/10.1002/lom3.10005>, [https://doi.org/10.1016/S0003-2670\(00\)88444-5](https://doi.org/10.1016/S0003-2670(00)88444-5), 2015.
- 10 Osudar, R., Matoušů, A., Alawi, M., Wagner, D., and Bussmann, I.: Environmental factors affecting methane distribution and bacterial methane oxidation in the German Bight (North Sea), *Estuar. Coast. Shelf Sci.*, 160, 10–21, <https://doi.org/10.1016/j.ecss.2015.03.028>, 2015.
- Osudar, R., Klings, K. W., Wagner, D., and Bussmann, I.: Effect of salinity on microbial methane oxidation in freshwater and marine environments, *Aquat. Microb. Ecol.*, 80, 181–192, <https://doi.org/10.3354/ame01845>, 2017.
- 15 Parnell, A. C., Inger, R., Bearhop, S., & Jackson, A. L. Source partitioning using stable isotopes: coping with too much variation. *PLoS one*, 5(3), e9672, <https://doi.org/10.1371/journal.pone.0009672>, 2010.
- Perrot, V., Ma, T., Vandeputte, D., Smolikova, V., Bratkic, A., Leermakers, M., Baeyens, W. and Gao, Y., Origin and partitioning of mercury in the polluted Scheldt Estuary and adjacent coastal zone. *Science of the Total Environment*, 878, p.163019, <https://doi.org/10.1016/j.scitotenv.2023.163019>, 2023.
- 20 Poffenbarger, H. J., Needelman, B. A., & Megonigal, J. P. Salinity influence on methane emissions from tidal marshes. *Wetlands*, 31(5), 831-842, <https://doi.org/10.1007/s13157-011-0197-0>, 2011.
- Quast, C., Pruesse, E., Yilmaz, P., Gerken, J., Schweer, T., Yarza, P., Peplies, J. and Glöckner, F.O., The SILVA ribosomal RNA gene database project: improved data processing and web-based tools. *Nucleic acids research*, 41(D1), pp.D590-D596, <https://doi.org/10.1093/nar/gks1219>, 2012.
- 25 Reeburgh, W. S.: Oceanic Methane Biogeochemistry, *Chem. Rev.*, 107, 486–513, <https://doi.org/10.1021/cr050362v>, 2007.
- Rehder, G., Keir, R. S., Suess, E., and Pohlmann, T. The Multiple Sources and Patterns of Methane in North Sea Waters. *Aquatic Geochemistry*, 4(3), 403-427, <https://doi.org/10.1023/A:1009644600833>, 1998.
- 30 Röckmann, T., Eyer, S., van der Veen, C., Popa, M. E., Tuzson, B., Monteil, G., Houweling, S., Harris, E., Brunner, D., Fischer, H., Zazzeri, G., Lowry, D., Nisbet, E. G., Brand, W. A., Necki, J. M., Emmenegger, L., and Mohn, J.: In situ observations of the isotopic composition of methane at the Cabauw tall tower site, *Atmos. Chem. Phys.*, 16, 10469–10487, <https://doi.org/10.5194/acp-16-10469-2016>, 2016.
- Rosentreter, J. A., Laruelle, G. G., Bange, H. W., Bianchi, T. S., Busecke, J. J. M., Cai, W.-J., Eyre, B. D., Forbrich, I., Kwon, E. Y., Mavara, T., Moosdorf, N., Van Dam, B., and Regnier, P.: Coastal vegetation and estuaries are collectively a greenhouse gas sink, *Nat. Clim. Change*, 13, 579–587, <https://doi.org/10.1038/s41558-023-01682-9>, 2023.
- 35 Sánchez-Rodríguez, J., Sierra, A., Jiménez-López, D., Ortega, T., Gómez-Parra, A., & Forja, J. Dynamic of CO<sub>2</sub>, CH<sub>4</sub> and N<sub>2</sub>O in the Guadalquivir estuary. *Science of The Total Environment*, 805, 150193, <https://doi.org/10.1016/j.scitotenv.2021.150193>, 2022.



- Sasakawa, M., Tsunogai, U., Kameyama, S., Nakagawa, F., Nojiri, Y., & Tsuda, A. Carbon isotopic characterization for the origin of excess methane in subsurface seawater. *Journal of Geophysical Research: Oceans*, 113(3). <https://doi.org/10.1029/2007JC004217>, 2008.
- 5 Schmale, O., Leifer, I., Deimling, J. S. v., Stolle, C., Krause, S., Kießlich, K., Frahm, A., and Treude, T.: Bubble Transport Mechanism: Indications for a gas bubble-mediated inoculation of benthic methanotrophs into the water column, *Cont. Shelf Res.*, 103, 70–78, <https://doi.org/10.1016/j.csr.2015.04.022>, 2015.
- Scranton, M.I., and K. McShane. 1991. Methane fluxes in the southern North Sea: the role of European rivers. *Continental Shelf Research* 11 (1): 37–52. [https://doi.org/10.1016/0278-4343\(91\)90033-3](https://doi.org/10.1016/0278-4343(91)90033-3).
- 10 Sherry, A., Osborne, K. A., Sidgwick, F. R., Gray, N. D., & Talbot, H. M. A temperate river estuary is a sink for methanotrophs adapted to extremes of pH, temperature and salinity. *Environmental Microbiology Reports*, 8(1), 122–131, <https://doi.org/10.1111/1758-2229.12359>, 2016.
- Silvennoinen, H., Liikanen, A., Rintala, J., Martikainen, P.J., Greenhouse gas fluxes from the eutrophic Temmesjoki River and its estuary in the Liminganlahti Bay (the Baltic Sea). *Biogeochemistry* 90, 193–208, <https://doi.org/10.1007/s10533-008-9244-1>, 2008.
- 15 Soetaert, K., Middelburg, J. J., Heip, C. H. R., Meire, P., Van Damme, S., & Maris, T. (2006). Long-term change in dissolved inorganic nutrients in the heterotrophic Scheldt estuary (Belgium, the Netherlands). *Limnology and Oceanography*, 51(1), 409–423. [https://doi.org/10.4319/lo.2006.51.1\\_part\\_2.0409](https://doi.org/10.4319/lo.2006.51.1_part_2.0409)
- Stanley, E. H., Loken, L. C., Casson, N. J., Oliver, S. K., Sponseller, R. A., Wallin, M. B., ... & Rocher-Ros, G. GRiMeDB: The global river database of methane concentrations and fluxes. *Earth System Science Data Discussions*, 2022, 1–94, <https://doi.org/10.6073/pasta/b7d1fba4f9a3e365c9861ac3b58b4a90>, 2022.
- 20 Steinle, L., Graves, A. C., Treude, T., Ferré, B., Biastoch, A., Bussmann, I., Berndt, C., Krastel, S., James, R. H., Behrens, E., Böning, C. W., Greinert, J., Sapart, C., Scheinert, M., Sommer, S., Lehmann, M. F., and Niemann, H.: Water column methanotrophy controlled by a rapid oceanographic switch, *Nat. Geosci.*, 8, 378–382, <https://doi.org/10.1038/ngeo2420>, 2015.
- 25 Stoll, M.H.C, Bakker K., Nobbe G.H., Haese R.R., *Analytical Chemistry*, Vol 73, Number 17, pp 4111–4116, <https://doi.org/10.1021/ac010303r>, 2001.
- Struyf, E., Van Damme, S., & Meire, P. Possible effects of climate change on estuarine nutrient fluxes: a case study in the highly nutrified Schelde estuary (Belgium, The Netherlands). *Estuarine, Coastal and Shelf Science*, 60(4), 649–661, <https://doi.org/10.1016/j.ecss.2004.03.004>, 2004.
- 30 Tavormina P. L., Ussler W. III, Orphan V. J. Planktonic and sediment-associated aerobic methanotrophs in two seep systems along the North American margin. *Appl Environ Microbiol*, <https://doi.org/10.1128/AEM.00069-08>, 2008.
- Tavormina, P. L., Hatzenpichler, R., McGlynn, S., Chadwick, G., Dawson, K. S., Connon, S. A., and Orphan, V. J.: *Methyloprofundus sedimenti* gen. nov., sp. nov., an obligate methanotroph from ocean sediment belonging to the “deep sea-1” clade of marine methanotrophs, *Int. J. Syst. Evol. Microb.*, 65, 251–259, <https://doi.org/10.1099/ijs.0.062927-0>, 2015.
- 35 Upstill-Goddard, R. C., and Barnes, J. Methane emissions from UK estuaries: re-evaluating the estuarine source of tropospheric methane from Europe. *Marine Chemistry*, 180, 14–23, <https://doi.org/10.1016/j.marchem.2016.01.010>, 2016.



- Van Ael, E., Covaci, A., Blust, R., and Bervoets, L. Persistent organic pollutants in the Scheldt estuary: environmental distribution and bioaccumulation. *Environment international*, 48, 17-27, <https://doi.org/10.1016/j.envint.2012.06.017>, 2012.
- 5 Van Damme, S., Struyf, E., Maris, T., Ysebaert, T., Dehairs, F., Tackx, M., Heip, C. H. R., & Meire, P. Spatial and temporal patterns of water quality along the estuarine salinity gradient of the Scheldt estuary (Belgium and the Netherlands): Results of an integrated monitoring approach. *Hydrobiologia*, 540, 29 - 45, <https://doi.org/10.1007/s10750-004-7102-2>, 2005.
- 10 Vekeman, B., Kerckhof, F.M., Cremers, G., De Vos, P., Vandamme, P., Boon, N., Op den Camp, H.J. and Heylen, K., 2016. New Methyloceanibacter diversity from North Sea sediments includes methanotroph containing solely the soluble methane monooxygenase. *Environmental microbiology*, 18(12), pp.4523-4536, <https://doi.org/10.1111/1462-2920.13485>, 2016.
- Whiticar, M. J.: Carbon and hydrogen isotope systematics of bacterial formation and oxidation of methane, *Chem. Geol.*, 161, 291–314, [https://doi.org/10.1016/S0009-2541\(99\)00092-3](https://doi.org/10.1016/S0009-2541(99)00092-3), 1999.
- 15 Wiesenberg, D. A. and Guinasso, N. L.: Equilibrium Solubilities of Methane, Carbon Monoxide, and Hydrogen in Water and Sea Water, *J. Chem. Eng. Data*, 24, 356–360, <https://doi.org/10.1021/je60083a006>, 1979.
- Woodward, G., Perkins, D. M., and Brown, L. E.: Climate change and freshwater ecosystems: impacts across multiple levels of organization, *Philos T. R. Soc. Lond. B*, 365, 2093–2106, <https://doi.org/10.1098/rstb.2010.0055>, 2010.
- 20 Wu, Z., Li, M., Qu, L., Zhang, C. and Xie, W. Metagenomic insights into microbial adaptation to the salinity gradient of a typical short residence-time estuary. *Microbiome* 12, 115, <https://doi.org/10.1186/s40168-024-01817-w>, 2024.
- Yang, Y., Chen, J., Pratscher, J., and Xie, S. DNA-SIP reveals an overlooked methanotroph, *Crenothrix* sp., involved in methane consumption in shallow lake sediments. *Science of the Total Environment*, 814, 152742, <https://doi.org/10.1016/j.scitotenv.2021.152742>, 2022.
- 25 Zhang, G., Zhang, J., Lui, S., Ren, J., Xu, J., Zhang, F., Methane in the Changjiang (Yangtze River) Estuary and its adjacent marine area: riverine input, sediment release and atmospheric fluxes. *Biogeochemistry* 91, 71–84, <https://doi.org/10.1007/s10533-008-9259-7>, 2008.
- 30 Zhang, S., Yan, L., Cao, J., Wang, K., Luo, Y., Hu, H., Wang, L., Yu, R., Pan, B., Yu, K., Zhao, J., and Bao, Z.: Salinity significantly affects methane oxidation and methanotrophic community in Inner Mongolia lake sediments, *Front. Microbiol.*, 13, 1067017, <https://doi.org/10.3389/fmicb.2022.1067017>, 2023.
